# Supplementary material for: First real-world experience with 1L pembrolizumab and chemotherapy treatment for advanced triple-negative breast cancer in Poland: safety analysis and first survival outcomes from a multicenter cohort
Source: Research Square preprint supplement (doi:10.21203/rs.3.rs-7367639/v1), 2025-09-23
Supplement: Supplementary file 1 [file d397d42303f9268364abf684.docx]

Supplementary Appendix

**Methods**

**Polish drug reimbursment program**

**Reimbursement policy scope**
This drug program provides access to pembrolizumab combined with paclitaxel or gemcitabine/carboplatin for individuals diagnosed with PD-L1-positive (CPS ≥10) metastatic or locally advanced triple-negative breast cancer (TNBC). Treatment is restricted to patients with no history of systemic therapy for inoperable or metastatic TNBC, excluding therapies completed with curative intent over 6 months prior. Pembrolizumab use in prior perioperative settings precludes program eligibility.

**Eligibility Requirements**
Applicants must fulfill all the following:

1. Minimum age of 18 years
2. Histological confirmation of TNBC, either: metastatic disease (stage IV), or locally advanced (stage III) when not eligible for surgery/radiation
3. Triple-negative status confirmed histologically
4. Hormone receptor negativity (<1% ER/PR)
5. HER2-negative status (IHC 0 or 1+ and ISH-negative)
6. PD-L1 CPS ≥10 by validated test
7. Measurable lesions per RECIST 1.1
8. ECOG 0–1
9. No pregnancy or breastfeeding
10. Absence of rapidly progressing or life-threatening visceral metastases
11. No uncontrolled comorbidities that would contraindicate therapy
12. No untreated or progressing brain metastases
13. Organ function permitting safe therapy (laboratory confirmed)
14. In cases of concurrent malignancies, a favorable prognosis must be established

Patients already receiving the same active substances under a different funding method (excluding clinical trials) may continue therapy through the program if all initial inclusion criteria were met.

**Treatment Duration and Termination**
Treatment persists until a physician-led decision for withdrawal based on:

1. Disease progression
2. Functional decline (ECOG 3–4)
3. Serious or life-threatening toxicity
4. Pregnancy
5. Informed clinical judgment of diminished benefit
6. Lack of adherence to treatment monitoring protocols
7. Withdrawal of patient consent to participate in the drug reimbursement program.

Table S1: Participating centers

| Center No. | Institution Name | City | Country | Type of Center | Number of Patients |
| --- | --- | --- | --- | --- | --- |
| 1. | National Research Institute of Oncology | Warszawa | Poland | National Research Institute | 25 |
| 2. | Lower Silesian Comprehensive Cancer Center | Wrocław | Poland | Comprehensive Cancer Center | 12 |
| 3. | Maria Skłodowska-Curie National Research Institute of Oncology | Gliwice | Poland | National Research Institute | 12 |
| 4. | Department of Clinical Oncology, **Maritime Hospital** | Gdynia | Poland | Regional Oncology Hospital | 10 |
| 5. | National Research Institute of Oncology | Kraków | Poland | National Research Institute | 8 |
| 6. | West Pomeranian Oncology Center | Szczecin | Poland | Comprehensive Cancer Center | 6 |
| 7. | M. Skłodowska-Curie Bialystok Oncology Center | Białystok | Poland | Comprehensive Cancer Center | 5 |
| 8. | Department of Clinical Oncology, Ludwik Rydygier Hospital | Kraków | Poland | Regional Oncology Hospital | 4 |
| 9. | Holy Cross Cancer Center, Department of Clinical Oncology | Kielce | Poland | Comprehensive Cancer Center | 3 |
| 10. | Department of Metabolic Diseases and Immuno-oncology, Medical University of Lublin | Lubin | Poland | Comprehensive Cancer Center | 2 |
| 11. | Department of Oncology, Specialist Hospital | Legnica | Poland | Regional Oncology Hospital | 1 |
| 12. | Department of Oncology and Radiotherapy, Medical University of Gdańsk | Gdańsk | Poland | Comprehensive Cancer Center | 1 |
| 13. | Clinical Oncology Day Care Unit | Sucha Beskidzka | Poland | Regional Oncology Hospital | 1 |
